# Supplementary material for: Effects of Eugenol on Haemoproteus columbae in domestic pigeons (Columba livia domestica) from Riyadh, Saudi Arabia
Source: PubMed Central journal article supplement (PMC6533204; doi:10.1042/bsr20190409), 2019-05-24
Supplement: bsr20190409_Supp1.pdf [file bsr20190409_Supp1.pdf]

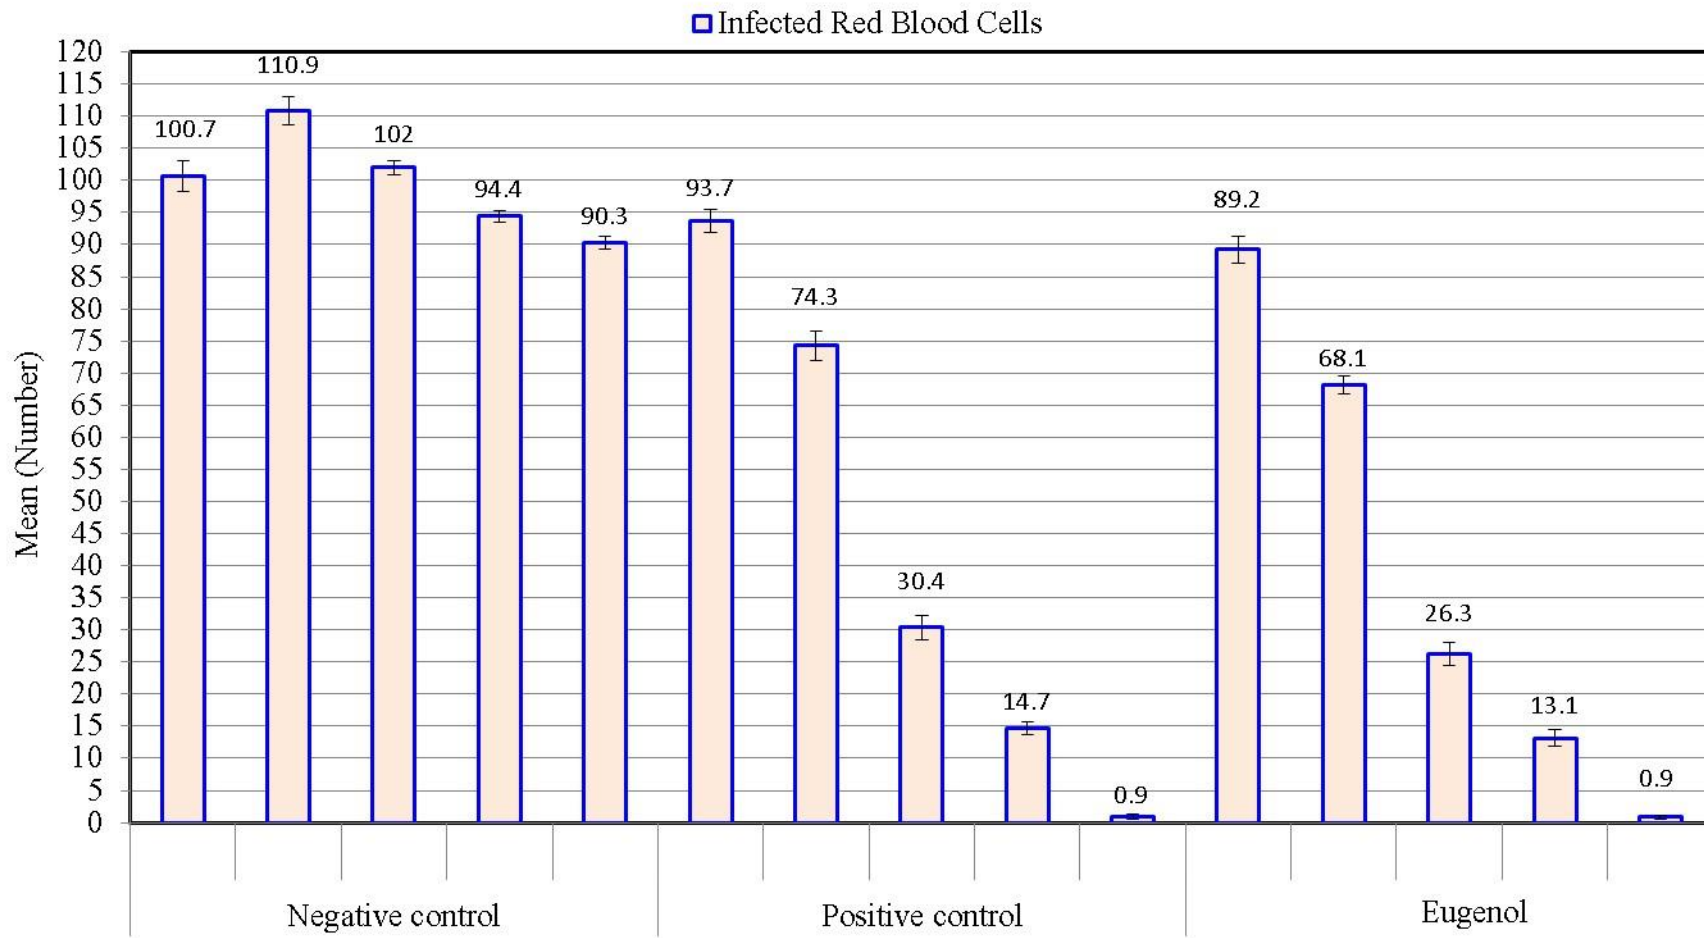

Mean values interaction between treatment and times on the infected red blood cells number in of squabs.
